# Supplementary material for: Immobilization of laccase on magnetically separable biochar for highly efficient removal of bisphenol A in water
Source: Royal Society of Chemistry journal article supplement (doi:10.1039/c9ra08800h), 2020-01-01
Supplement: c9ra08800h1.pdf [file c9ra08800h1.pdf]

1 **Supporting Information for:**

2 **Immobilization of laccase on magnetically separable biochar for highly efficient removal of**  
3 **bisphenol A in water**

4  
5 Yu Zhang<sup>1</sup>, Mingyue Piao<sup>1,2</sup>, Lingzhi He<sup>1</sup>, Lan Yao<sup>1</sup>, Tiezhu Piao<sup>3</sup>, Zairan Liu<sup>1</sup>, Yunxian Piao<sup>1,\*</sup>

6  
7 <sup>1</sup> Key Laboratory of Groundwater Resources and Environment (Jilin University), Ministry of  
8 Education, Jilin Provincial Key Laboratory of Water Resources and Environment, College of New  
9 Energy and Environment, Jilin University, Changchun 130021, China

10 <sup>2</sup> College of Environmental Science and Engineering, Jilin Normal University, Siping, Jilin, 136000,  
11 China

12 <sup>3</sup>Department of Biochemical Engineering, Yanbian University of Science and Technology, Yanji  
13 133000, China

14

15

16

17

18 \*Corresponding author: Professor Yunxian Piao

19 Key Laboratory of Ground Water Resources and Environment of the Ministry of Education, College  
20 of New Energy and Environment, Jilin University, 2519 Jiefang Road, Changchun 130021, China

21 E-mail: yxpiao@jlu.edu.cn, Phone: +86-18604414674, Fax: +86-431-8850-2606

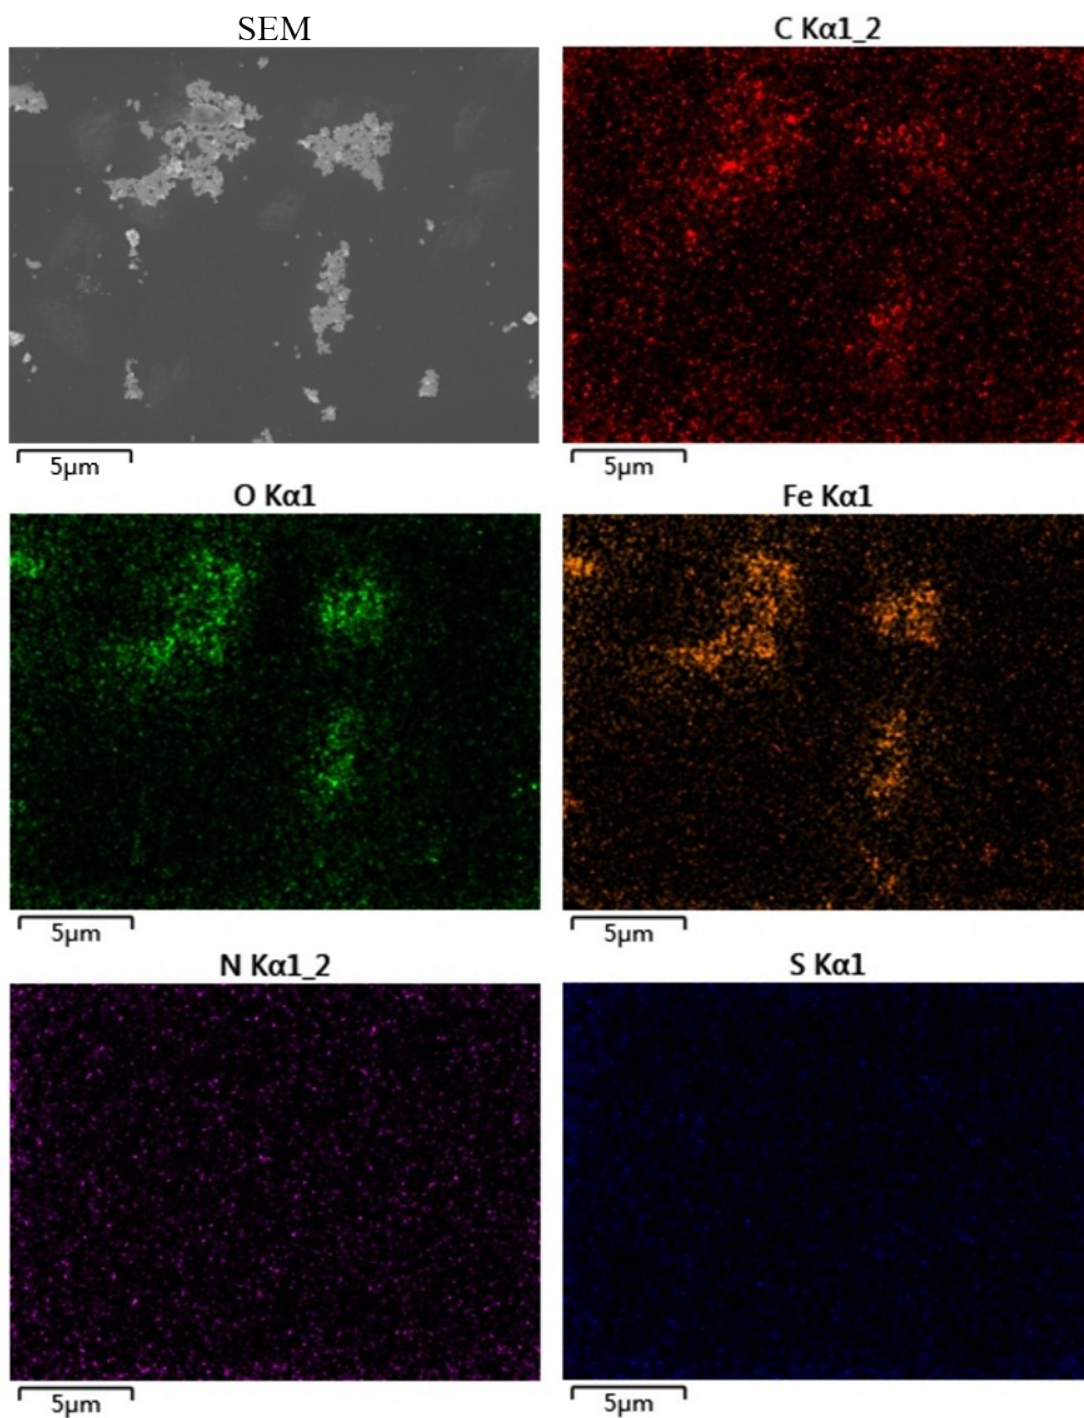

1  
2 **Fig. S1** Element analysis of MBC: mapping images of carbon, oxygen, iron, nitrogen and sulfur by  
3 energy dispersive spectrometer.

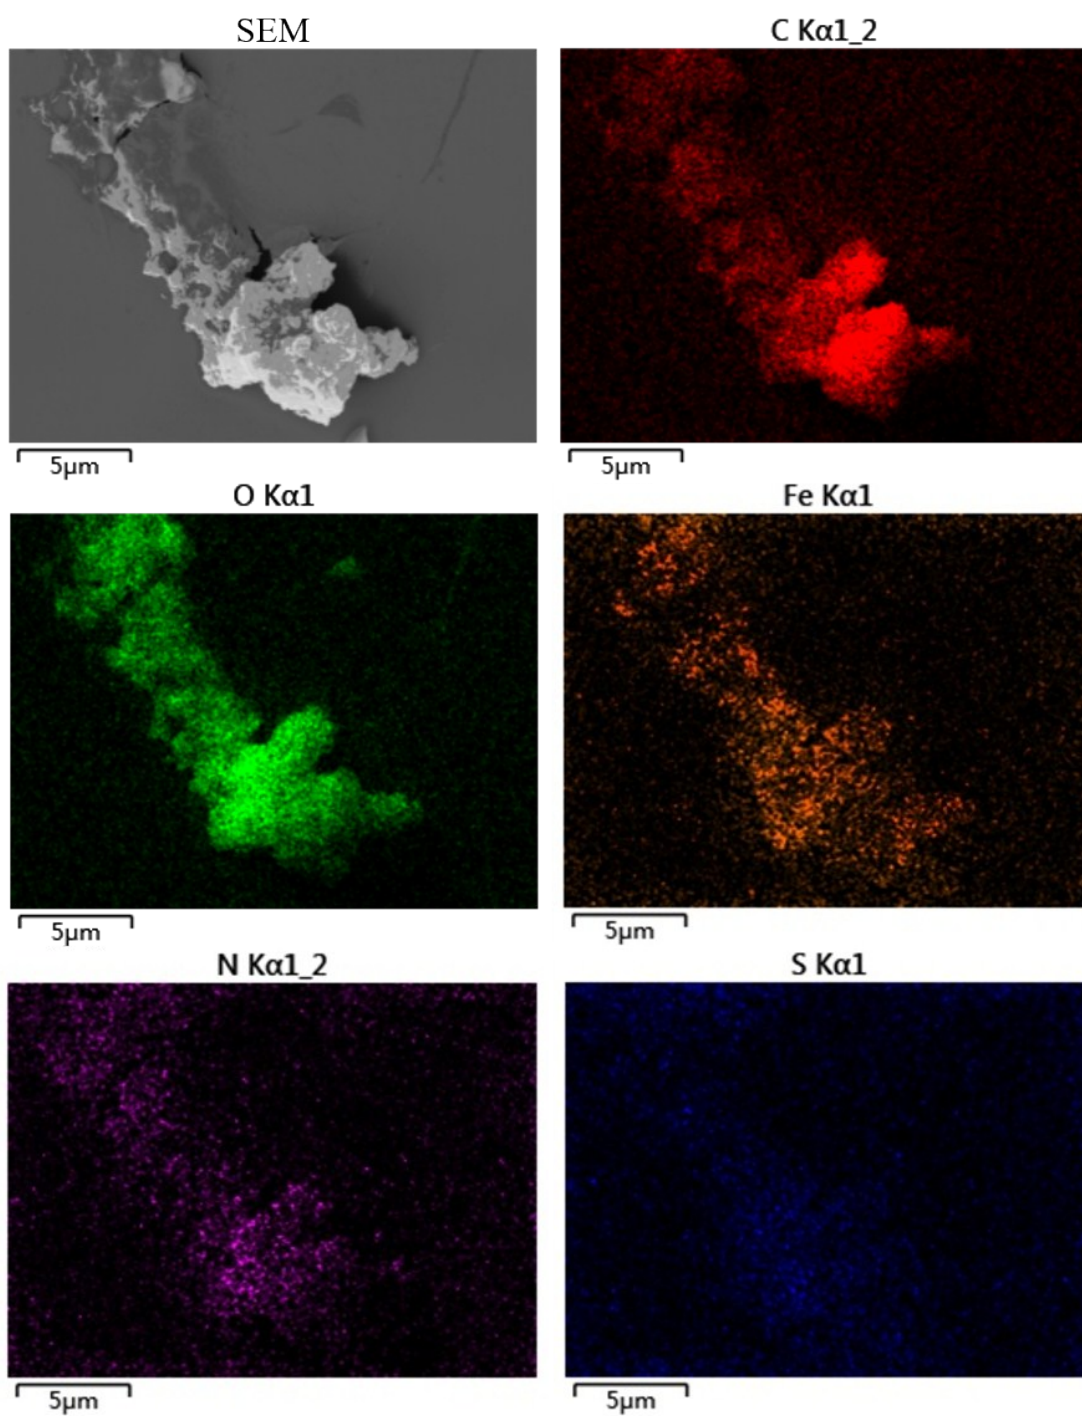

1

2 **Fig. S2** Element analysis of L-MBC: mapping images of carbon, oxygen, iron, nitrogen and sulfur by  
3 energy dispersive spectrometer.

4

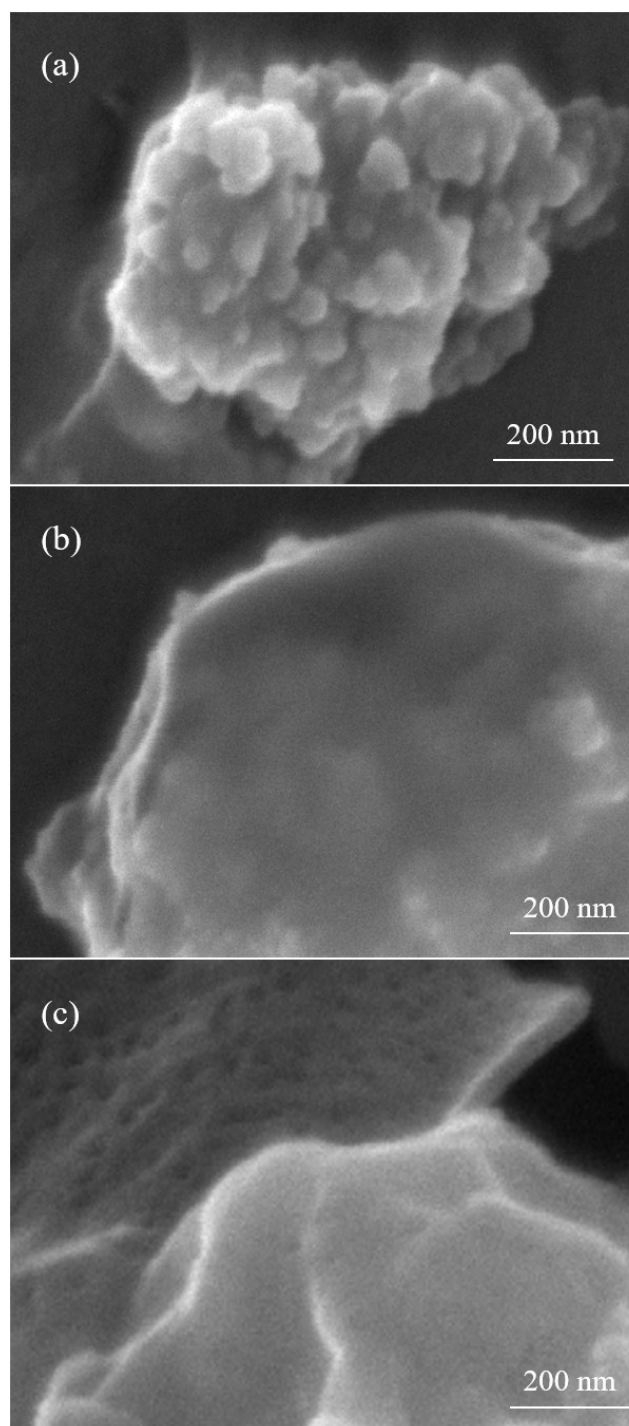

1

2 **Fig. S3** Magnification of SEM images of (a) magnetic biochar, (b) L-MBC prepared by adsorption  
3 and precipitation, (c) L-MBC prepared by adsorption, precipitation and crosslinking.

4

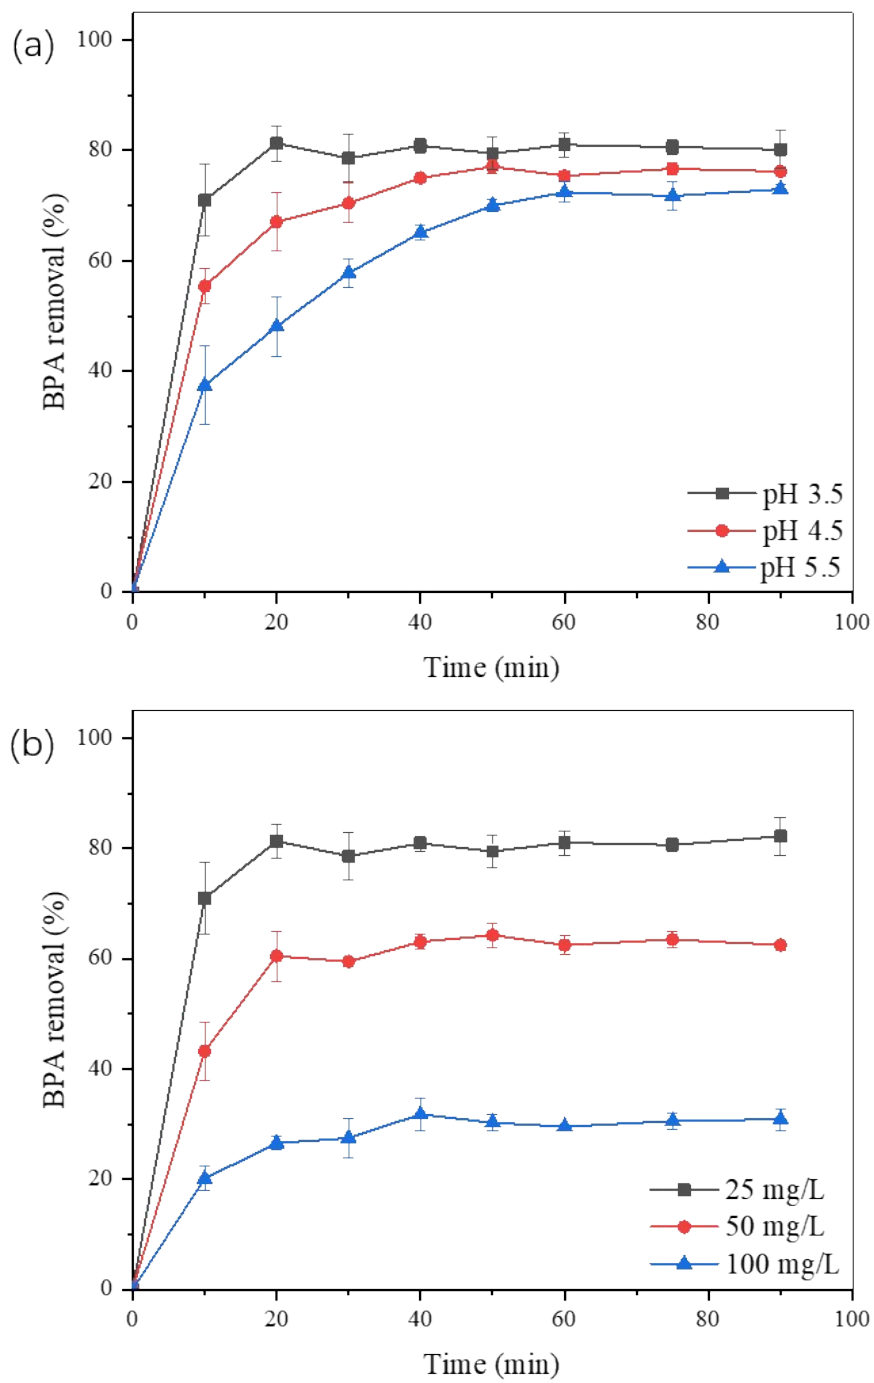

1  
 2 **Fig. S4** BPA removal profiles with deactivated L-MBC (0.3 g·L<sup>-1</sup>) at (a) different pH conditions  
 3 (BPA 25 mg·L<sup>-1</sup>), and (c) with different initial BPA concentrations (pH = 3.5).  
 4

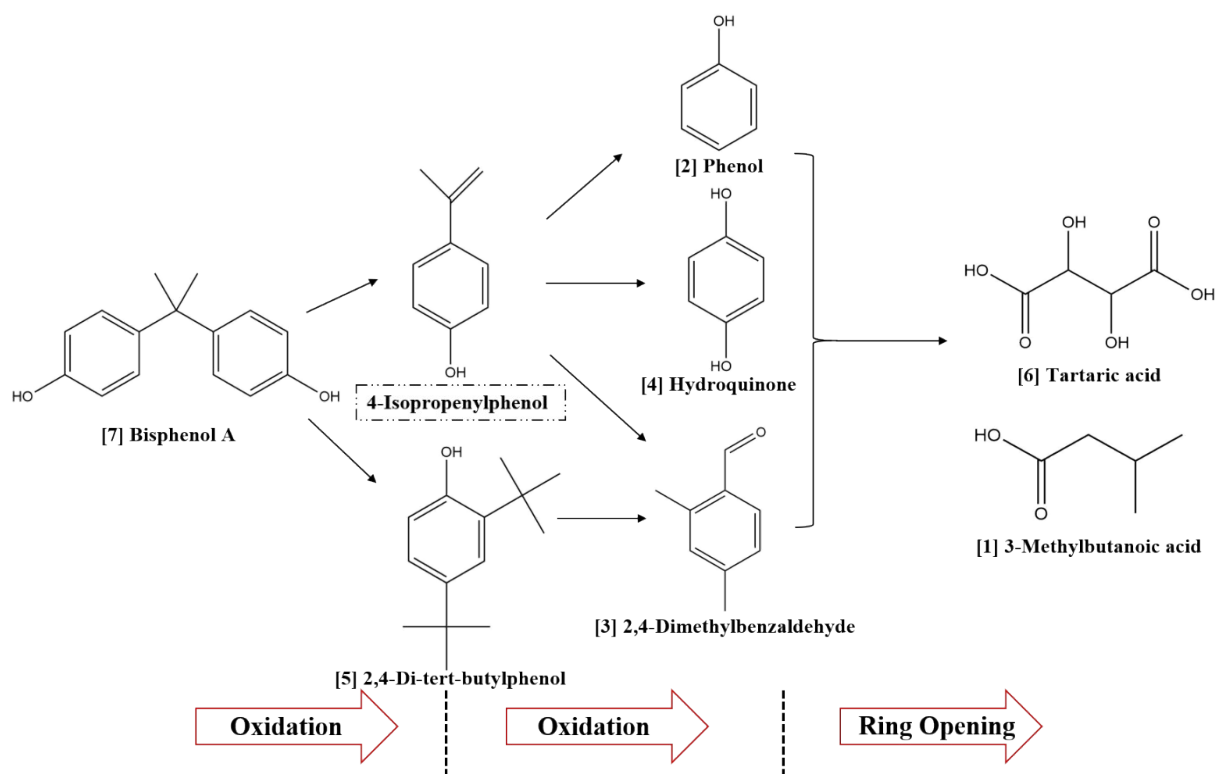

**Fig. S5** Possible pathways of BPA degradation by L-MBC based on its degradation products.

Compounds that were not identified but may exist in the reaction mixture were highlighted using the dotted boxes.

1 **Table S1**

2 List of produced compounds detected with GC-MS after catalytic degradation of BPA by the L-MBC.

| Compounds                    | Molecular formula                              | Rt (min) | Structure                                                                             |
|------------------------------|------------------------------------------------|----------|---------------------------------------------------------------------------------------|
| [1] 3-Methylbutanoic acid    | C <sub>5</sub> H <sub>10</sub> O <sub>2</sub>  | 7.34     | 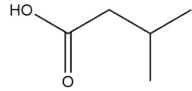   |
| [2] Phenol                   | C <sub>6</sub> H <sub>6</sub> O                | 7.65     |    |
| [3] 2,4-Dimethylbenzaldehyde | C <sub>9</sub> H <sub>10</sub> O               | 13.48    |    |
| [4] Hydroquinone             | C <sub>6</sub> H <sub>6</sub> O <sub>2</sub>   | 17.01    |   |
| [5] 2,4-Di-tert-butylphenol  | C <sub>14</sub> H <sub>22</sub> O              | 18.02    |  |
| [6] Tartaric acid            | C <sub>4</sub> H <sub>6</sub> O <sub>6</sub>   | 19.35    |  |
| [7] Bisphenol A              | C <sub>15</sub> H <sub>16</sub> O <sub>2</sub> | 25.98    |  |

3

---

1 **Table S2**

2 Main ion concentrations in environmental water samples from Yitong River.

3

|                               | Average concentration (mg·L <sup>-1</sup> ) |
|-------------------------------|---------------------------------------------|
| Na <sup>+</sup>               | 23.21                                       |
| K <sup>+</sup>                | 5.03                                        |
| Ca <sup>2+</sup>              | 52.85                                       |
| Mg <sup>2+</sup>              | 6.08                                        |
| HCO <sub>3</sub> <sup>-</sup> | 150.71                                      |
| SO <sub>4</sub> <sup>2-</sup> | 29.43                                       |
| Cl <sup>-</sup>               | 28.08                                       |
| NO <sub>3</sub> <sup>-</sup>  | 19.18                                       |
